# Supplementary material for: Surface passivated silicon nanocrystals with stable luminescence synthesized by femtosecond laser ablation in solution
Source: Royal Society of Chemistry journal article supplement (doi:10.1039/c1cp21366k), 2011-01-01
Supplement: c1cp21366k.pdf [file c1cp21366k.pdf]

Supporting information:

## Surface passivated silicon nanocrystals with stable luminescence synthesized by Femtosecond Laser Ablation in Liquid

Dezhi Tan,<sup>1</sup> Zhijun Ma,<sup>1</sup> Beibei Xu,<sup>1</sup> Ye Dai,<sup>2</sup> Guohong Ma,<sup>2</sup> Min He,<sup>2</sup> Zuanming Jin<sup>2</sup> and Jianrong Qiu<sup>\*1,3</sup>

<sup>1</sup>State Key Laboratory of Silicon Materials, Zhejiang University, Hangzhou, Zhejiang 310027, P. R. China.

<sup>2</sup>Department of Physics, Shanghai University, Shanghai 200444, P. R. China.

<sup>3</sup>State Key Laboratory of Luminescence Physics and Chemistry and Institute of Optical Communication Materials, South China University of Technology, Guangzhou, Guangdong 510640, P.R. China.

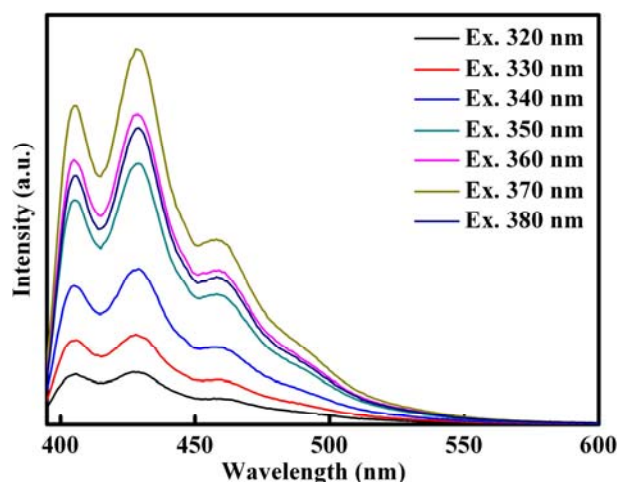

**Fig. 1** Emission spectra of silicon nanocrystals synthesized by Femtosecond Laser Ablation in 1-hexene dissolved in ethanol.
